# Supplementary material for: Safety and efficacy of CAR-T cell targeting BCMA in patients with multiple myeloma coinfected with chronic hepatitis B virus
Source: PubMed Central journal article supplement (PMC7430488; doi:10.1136/jitc-2020-000927), 2020-08-13
Supplement: jitc-2020-000927supp001.pdf [file jitc-2020-000927supp001.pdf]

## **Supplementary Materials**

### **BCMA CAR-T cell therapy in patients with multiple myeloma and chronic hepatitis B virus infection**

Lu Han, Jian Zhou, Ke-Shu Zhou, Xing-Hu Zhu, Ling-Di Zhao, Bai-Jun Fang, Qing-Song Yin, Xu-Dong Wei, Hu Zhou, Lin-Lin Li, Beng-Ling Xu, Ji-Shuai Zhang, Yong-Ping Song\*, Quan-Li Gao\*

#### **Inclusion Criteria**

Patients enrolled in the enrollment accord with the following conditions in this study.

The criteria set include the diagnosis of multiple myeloma, the lack of effective treatment options (such as autologous or allogenic stem cell transplantation) and the limited overall survival time after treatment with existing treatments, as follows:

1. Age: 18~75 years old, expected survival period is greater than 3 months;
2. Confirmed as active MM according to IMWG, and confirmed as BCMA positive MM by immunohistochemistry or flow cytometry;
3. According to any of the following criteria, there were measurable indexes: serum monoclonal protein (M protein) in serum  $\geq 1.0$  g/dL or urine M protein level  $\geq 200$  mg/24 hours; serum free light chains (FLC) (involved FLC concentration of  $\geq 10$  mg/dL with abnormal ratio); bone marrow plasma cells  $\geq 10\%$ ;
4. At least three previous lines of therapy, each line of treatment has at least 1 complete treatment cycle, except the best response to the treatment regimen was recorded as progressive diseases (according to the IMWG criteria);
5. Received an immunomodulatory drug (IMiD) and a proteasome inhibitor (PI), or disease refractory to both drug classes; and adequate organ function;
6. The patients enrolled in this subjects needed to be progressing after most recent therapy and had measurable disease simultaneously. Disease progression must be proved by objective examination data.
7. ECOG score 0-2;

8. The clinical laboratory values during screening period met the following criteria: hemoglobin  $\geq 60$  g/L (no red blood cell was infused in the first 7 days of laboratory examination; recombinant human erythropoietin was permitted to use), platelet  $\geq 30 \times 10^9/L$  (blood transfusion must not be supported by infusion fraction within 7 days before laboratory examination); the absolute value of neutrophils  $\geq 0.75 \times 10^9/L$  (growth factor support is allowed to use, but no support treatment must be received within 7 days of laboratory examination); AST and ALT  $\leq 2.5 \times$  normal upper limit (ULN); total bilirubin  $\leq 3.0 \times$  ULN (direct bilirubin  $\leq 1.5 \times$  ULN is required for subjects with preemptive hyperglycemia, such as Gilbert syndrome); renal function Cr  $\leq 1.25$  ULN; corrected serum calcium  $\leq 12.5$  mg/dL or free ion calcium  $\leq 6.5$  mg/dL;
9. In addition to hair loss or peripheral neuropathy, the toxicity of prior anti-tumor treatment must be returned to a baseline level or  $\leq$  level 1;
10. There are no other serious diseases (such as autoimmune diseases, immunodeficiencies, organ transplants) that conflict with this program;
11. No history of other malignant tumors;
12. Within 7 days before the trial, women in childbearing age should do a blood pregnancy test and the result should be negative; and women in childbearing age must adopt appropriate contraceptive measures during the trial period and within 3 months after the trial;
13. The patient agrees to participate in the clinical study and sign the informed consent form.

### **Exclusion Criteria**

Any exclusion criteria are not eligible for inclusion:

1. Pregnant or lactating women (for women in childbearing age, a pregnancy check is necessary);
2. Patients who suffer from severe infectious diseases or viral diseases (HIV positive, syphilis, etc.);
3. Active hepatitis B or C;

4. Patients who have systematically used large amounts of glucocorticoids with 1 week before enrollment;
5. Patients who suffer from severe heart, liver, kidney dysfunction, diabetes or other diseases;
6. Patients who have been in other clinical studies in the past 3 months or who have been treated with other gene products;

#### **Preparation and Phenotype of CAR-T Cells**

The BCMA CAR-T cells were derived from autologous peripheral blood mononuclear cells, and CD3<sup>+</sup> T cells were isolated by positive magnetic selection (Miltenyi, Bergisch Gladbach, Germany). Cell purity was detected using a FACSCanto II system (BD Biosciences, San Jose, CA, USA) and staining with anti-CD3-APC (Biolegend, San Diego, CA, USA). CD3<sup>+</sup> T cells were stimulated with Retronectin (Takara Bio, Otsu, Japan) and the anti-CD3 mAb (Takara Bio). The cells were transduced 1 day after activation with a lentiviral vector, containing the anti-BCMA CAR (offered by Shenzhen Pregene Biopharma Company, Ltd.), and expanded over a period of 12 days. All cells were expanded and analyzed by flow cytometry, until day 12. Cells were harvested, washed in cold phosphate-buffered saline (PBS), and resuspended at  $1 \times 10^6$  in 100  $\mu$ L of cold PBS comprising 5% serum. Cells were stained with Biotinylated Human BCMA, Fc Tag (BC7-H82F0, ACRO), anti-CD4-PE-Cy7, anti-CD8-PerCP-Cy5.5, anti-CD45RA-APC-Cy7, anti-CCR7-APC (all purchased from Biolegend) for 20 min on ice. FACS analysis was performed using a FACSCanto II system and CellQuest software (BD Biosciences).

#### **Treatment Administration**

Patients received lymphodepletion with fludarabine (25–30 mg/m<sup>2</sup> on days –5 to –3) and cyclophosphamide (600–800 mg/m<sup>2</sup> on days –5 to –4) followed by infusion of CAR-T on day 0. On day –1, weeks 4, 10, 16, 22 and every 10 weeks thereafter, efficacy were performed. The dose was  $5 \times 10^6$  CAR-positive T cells/kg. The positive percentage of BCMA CAR-T cells was (32.33  $\pm$  14.77)%. The percentage of CD4<sup>+</sup> cells and CD8<sup>+</sup> cells were (32.63  $\pm$  13.86)%, (65.33  $\pm$  12.11)% respectively. In addition, effector memory (CD45RA<sup>–</sup> CCR7<sup>–</sup>) and differentiated effector memory (CD45RA<sup>+</sup> CCR7<sup>–</sup>) cells account for the main proportion in CD4<sup>+</sup> and CD8<sup>+</sup> cell

subpopulation (Supplementary Table 1).

### **Cytokine Secretion**

Cytokines, including IL-6, IL-10 and IFN- $\gamma$ , using ELISA kits (R&D Systems, Minneapolis, MN, USA) according to manufacturer protocol. All samples were analyzed in triplicate and compared against multiple internal standards using standard curves. Data was acquired, and analysis was performed using MasterPlex ReaderFit (Hitachi Solutions America, Ltd., Irvine, CA, USA).

### **Assessment of CAR-T Cells by Quantitative Real-Time PCR**

CAR DNA copy numbers were determined for evaluating CAR-T cell expansion and persistence. Genomic DNA was extracted using a QIAamp DNA Blood Mini Kit (Qiagen, Hilden, Germany) from fresh peripheral blood samples after CAR-T cell infusion. CAR DNA copy numbers were assessed by quantitative real-time PCR.

## Results

**Supplemental Figure 1.** The change of bilirubin (left panel), transaminase and albumin (right panel) levels with patient 9 who has seroreversion of the HBsAg after CAR-T cells infusion. TBIL, total bilirubin (normal range, 0–21  $\mu\text{M}$ ); DBIL, direct bilirubin (normal range, 0–5  $\mu\text{M}$ ); IBIL, indirect bilirubin (normal range, 0–15  $\mu\text{M}$ ); ALT, alanine transferase (normal range, 5–40 U/L); AST, aspartate transaminase (normal range, 8–40 U/L); ALB, albumin (normal range, 34–48 g/L).

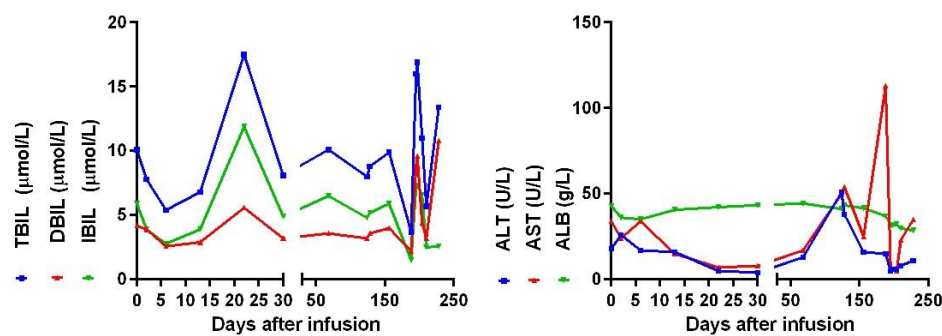

Supplementary Table 1. Information of CAR-T cells in product, conditioning therapy and method of infusion.

| Patient | Fraction of CAR <sup>+</sup> T cells (%) | CD4 <sup>+</sup> cells (%) | CD4 <sup>+</sup> cells |                       |                       |                       | CD8 <sup>+</sup> cells (%) | CD8 <sup>+</sup> cells |                       |                       |                       | Conditioning therapy* | Method of infusion |
|---------|------------------------------------------|----------------------------|------------------------|-----------------------|-----------------------|-----------------------|----------------------------|------------------------|-----------------------|-----------------------|-----------------------|-----------------------|--------------------|
|         |                                          |                            | CD45RA <sup>+</sup>    | CD45RA <sup>-</sup>   | CD45RA <sup>-</sup>   | CD45RA <sup>+</sup>   |                            | CD45RA <sup>+</sup>    | CD45RA <sup>-</sup>   | CD45RA <sup>-</sup>   | CD45RA <sup>+</sup>   |                       |                    |
|         |                                          |                            | CCR7 <sup>+</sup> (%)  | CCR7 <sup>+</sup> (%) | CCR7 <sup>-</sup> (%) | CCR7 <sup>-</sup> (%) |                            | CCR7 <sup>+</sup> (%)  | CCR7 <sup>+</sup> (%) | CCR7 <sup>-</sup> (%) | CCR7 <sup>-</sup> (%) |                       |                    |
| 1       | 40                                       | 34.9                       | 5                      | 5.2                   | 84.5                  | 5.4                   | 61.9                       | 6.6                    | 2.6                   | 68.6                  | 22.2                  | FC                    | one-infusion       |
| 2       | 55                                       | 55.8                       | 2.2                    | 6.4                   | 69.3                  | 22                    | 52.4                       | 40.9                   | 19.6                  | 15.1                  | 24.3                  | FC                    | one-infusion       |
| 3       | 23                                       | 15.3                       | 0.7                    | 1.1                   | 96.7                  | 2.5                   | 81.1                       | 0.8                    | 1                     | 93.5                  | 4.6                   | FC                    | one-infusion       |
| 4       | 40                                       | 24.4                       | 0.8                    | 0.3                   | 75.8                  | 23                    | 71.2                       | 3.4                    | 1.7                   | 44.4                  | 50.5                  | FC                    | one-infusion       |
| 5       | 13                                       | 15.6                       | 0.9                    | 0.6                   | 51.2                  | 47.3                  | 83.3                       | 3.9                    | 0.2                   | 6                     | 89.9                  | FC                    | one-infusion       |
| 6       | 5                                        | 22.6                       | 0.2                    | 0.1                   | 42.8                  | 56.9                  | 76.8                       | 4.3                    | 0.2                   | 7.2                   | 88.2                  | FC                    | one-infusion       |
| 7       | 40                                       | 44.2                       | 0.9                    | 0.5                   | 48.2                  | 50.4                  | 54                         | 3.9                    | 0.1                   | 15                    | 80.9                  | FC                    | one-infusion       |
| 8       | 35                                       | 44.5                       | 0.3                    | 1.1                   | 87.8                  | 14.7                  | 52.9                       | 2.8                    | 2.6                   | 52.8                  | 41.8                  | FC                    | one-infusion       |
| 9       | 40                                       | 45.4                       | 14                     | 26.1                  | 42                    | 17.9                  | 54.4                       | 5.5                    | 3.2                   | 26.7                  | 64.6                  | FC                    | one-infusion       |

Note: \* F, Fludarabine 25–30 mg/m<sup>2</sup> intravenously daily for 3 days; C, Cyclophosphamide 600–800 mg/m<sup>2</sup> intravenously daily for 2 days.

Supplementary Table 2. An elevation in bilirubin and transaminase levels for patients 1 and 5 after CAR-T cells infusion.

| Patient | TBIL      | DBIL      | IBIL      | ALT       | AST       | AE grading |
|---------|-----------|-----------|-----------|-----------|-----------|------------|
| 1       | 4.6 × ULN | 16 × ULN  | 1.1 × ULN | 2.5 × ULN | 6.3 × ULN | 4          |
| 9       | 2.1 × ULN | 7.4 × ULN | Normal    | 1.1 × ULN | 1.1 × ULN | 3          |

TBIL, total bilirubin; DBIL, direct bilirubin; IBIL, indirect bilirubin; ALT, alanine transferase; AST, aspartate transaminase; ULN, the normal upper limit. AE, adverse events (the grading of AE was according to the CTCAE 4.03).

Supplementary Table 3. The change of HBV serology with patient 9 who has seroreversion of the HBsAg after CAR-T cells infusion.

| Day     | HBsAg    | HBsAb    | HBeAg    | HBeAb    | HBcAb    | HBV DNA    | Antivira therapy |
|---------|----------|----------|----------|----------|----------|------------|------------------|
| Day 0   | Negative | Positive | Negative | Negative | Positive | <100 IU/mL | No               |
| Day 28  | Negative | Negative | Negative | Negative | Positive | --         | No               |
| Day 180 | Positive | Negative | Negative | Negative | Positive | <100 IU/mL | Entecavir        |
| Day 256 | Negative | Positive | Negative | Negative | Positive | --         | Entecavir        |

--, No assessment.

Supplementary Table 4. The fibrosis stage of patient 6 (HBsAg<sup>+</sup>).

| Parameter   | Day 0 | Day 17 | Day 28 | Day 70 | Day 112 | Day 154 | Day 224 |
|-------------|-------|--------|--------|--------|---------|---------|---------|
| APRI score  | 0.25  | 0.19   | 0.27   | 0.23   | 0.14    | 0.24    | 0.20    |
| FIB-4 score | 1.85  | 1.46   | 2.02   | 1.70   | 1.10    | 1.80    | 1.70    |

APRI score, Aspartate aminotransferase-to-Platelet Ratio Index (With an APRI threshold of 0.5, 1.0 and 1.5, the sensitivity & specificity values were 70.0% & 60.0%, 50.0% & 83.0% and 36.9% & 92.5% for significant fibrosis, advanced fibrosis and cirrhosis, respectively).<sup>1-3</sup> FIB-4 score, Fibrosis-4 Score (FIB-4 index <1.45 had a negative predictive value of 94.7% to exclude severe fibrosis with a sensitivity of 74.3%; FIB-4 index higher than 3.25 had a positive predictive value to confirm the existence of a significant fibrosis (F3-F4) of 82.1% with a specificity of 98.2%).<sup>4,5</sup>

Supplementary Table 5. The change of immunoglobulin (Ig) A in relapsed/refractory multiple myeloma after CAR-T infusion.

| Patient | Day 0  | Day 14 | Day 28 | Day 70 | Day 112 | Day 154 | Day 224 | Day 294 | Day 364 |
|---------|--------|--------|--------|--------|---------|---------|---------|---------|---------|
| 1       | 29.3   | 26.3   | 12.9   | 0.3    | 14.5    | 38.8    | 15      | --      | 32.8    |
| 2       | 84     | 30.9   | 7.4    | 13.9   | 46.3    | --      | 58.1    | 42.4    | 63.4    |
| 3       | 50.9   | 21.3   | 13.9   | 24.2   | 7.6     | 12.8    | 19.4    | 24.9    | 21.3    |
| 4       | 171.2  | 39.5   | --     | 6.8    | 2.7     | 12.2    | 17.7    | 30.7    | 38.3    |
| 5       | 30.9   | 13.1   | 6.4    | 5      | 16.4    | 31.9    | 35.7    | 49.8    | --      |
| 6       | 64.4   | --     | 5.4    | 9.4    | 15.2    | 21.3    | 29.3    | 31.2    | --      |
| 7       | 60.7   | 31.6   | 15.5   | 2.5    | 0.2     | 6.5     | 4.9     | --      | --      |
| 8       | 1874.9 | 1058.6 | 275.9  | 1.5    | 11.4    | 22.5    | 99.8    | --      | --      |
| 9       | 879.3  | 345.8  | 44.9   | 18     | 1911.9  | --      | --      | --      | --      |

--, No assessment. Normal range: 90–450 mg/dL.



Supplementary Table 6. The change of immunoglobulin (Ig) G in relapsed/refractory multiple myeloma after CAR-T infusion.

| Patient | Day 0 | Day 14 | Day 28 | Day 70 | Day 112 | Day 154 | Day 224 | Day 294 | Day 364 |
|---------|-------|--------|--------|--------|---------|---------|---------|---------|---------|
| 1       | 8177  | 2936   | 1377   | 423    | 268     | 369     | 370     | --      | 524     |
| 2       | 2065  | 1295   | 953    | 538    | 998     | --      | 1248    | 1494    | 1257    |
| 3       | 579   | 546    | --     | 318    | --      | 386     | 636     | 587     | --      |
| 4       | 1052  | 650    | --     | 404    | 311     | 283     | 336     | 372     | 360     |
| 5       | 567   | 345    | 289    | 505    | 613     | 902     | 1021    | 1059    | --      |
| 6       | 1574  | --     | 614    | 445    | 741     | 1169    | 1096    | 1195    | --      |
| 7       | 1451  | 1186   | 778    | 437    | 310     | 156     | 100     | --      | --      |
| 8       | 309   | 160    | 3.3    | 165    | 522     | 433     | 589     | --      | --      |
| 9       | 577   | 442    | 316    | 372    | 247     | --      | --      | --      | --      |

--, No assessment. Normal range: 800–1800 mg/dL.

Supplementary Table 7. The change of immunoglobulin (Ig) M in relapsed/refractory multiple myeloma after CAR-T infusion.

| Patient | Day 0 | Day 14 | Day 28 | Day 70 | Day 112 | Day 154 | Day 224 | Day 294 | Day 364 |
|---------|-------|--------|--------|--------|---------|---------|---------|---------|---------|
| 1       | 19.2  | 19.8   | 13.7   | 33.2   | 30.8    | 62.5    | 49.6    | --      | 59.3    |
| 2       | 19.3  | 12.2   | 7.3    | 16.7   | 64.4    | --      | 184.2   | 70.8    | 71.4    |
| 3       | 22.1  | 8.2    | --     | 11     | --      | 17.9    | 14.7    | 24.2    | --      |
| 4       | 179.1 | 88.3   | --     | 12     | 17.7    | 40      | 48      | 57      | 59.6    |
| 5       | 24.7  | 12     | 16     | 14.5   | 40.3    | 49.3    | 61.8    | 70.2    | --      |
| 6       | 81.8  | --     | 19.9   | 26.2   | 49.1    | 46.1    | 49.6    | 71.9    | --      |
| 7       | 6.2   | 6.6    | 12.6   | 3.5    | 0.9     | 29.6    | 77.4    | --      | --      |
| 8       | 23.9  | 17.7   | 11.33  | 7.1    | 39      | 35.8    | 106.6   | --      | --      |
| 9       | 38.8  | 25.3   | 11.4   | 34.3   | 36.4    | --      | --      | --      | --      |

--, No assessment. Normal range: 60–280 mg/dL.

## References

1. WHO. Guidelines for the prevention, care and treatment of persons with chronic hepatitis B infection. 2015-3-12.  
<http://www.who.int/hiv/pub/hepatitis/hepatitis-b-guidelines/en/>.
2. Lin ZH, Xin YN, Dong QJ, et al. Performance of the aspartate aminotransferase-to-platelet ratio index for the staging of hepatitis C-related fibrosis: an updated meta-analysis. *Hepatology*. 2011. 53(3): 726-36.
3. Xiao G, Yang J, Yan L. Comparison of diagnostic accuracy of aspartate aminotransferase to platelet ratio index and fibrosis-4 index for detecting liver fibrosis in adult patients with chronic hepatitis B virus infection: a systemic review and meta-analysis [J]. *Hepatology*, 2015, 61(1): 292-302.
4. Vallet-Pichard A, Mallet V, Nalpas B, et al. FIB-4: an inexpensive and accurate marker of fibrosis in HCV infection. comparison with liver biopsy and fibrotest. *Hepatology*. 2007. 46(1): 32-6.
5. Li Y, Chen Y, Zhao Y. The diagnostic value of the FIB-4 index for staging hepatitis B-related fibrosis: a meta-analysis. *PLoS One*. 2014. 9(8): e105728.
